# Supplementary material
Source: ML conference proceedings conference paper supplement (https://aclanthology.org/2026.semeval-1.222)
Supplement: SupplementaryMaterial [file data.pdf › Source/latex/figures/data.pdf]

## Raw Data

ID: ..., Text: ...

ID: 2, Text: text2

ID: 1, Text: text1

[{Aspect: aspect1,  
VA: 1.00#9.00,  
...},  
{Aspect: aspect2,  
VA: 4.00#6.00,  
...}]

$$V' = \frac{V - 5}{4}$$

$$A' = \frac{A - 5}{4}$$

## Normalization

ID: 1, Text: text1

Aspect: aspect1  
Valence: -1.00  
Arousal: 1.00

Aspect: aspect2  
Valence: -0.25  
Arousal: 0.25

.....

## Input Data

ID: 1-1

Data: **[BOS]** text1 **[SEP]** aspect1 **[EOS]**  
Labels: [-1.00, 1.00]

ID: 1-2

Data: **[BOS]** text1 **[SEP]** aspect2 **[EOS]**  
Labels: [-0.25, 0.25]

.....
