# Supplementary material
Source: ML conference proceedings conference paper supplement (https://aclanthology.org/2026.semeval-1.222)

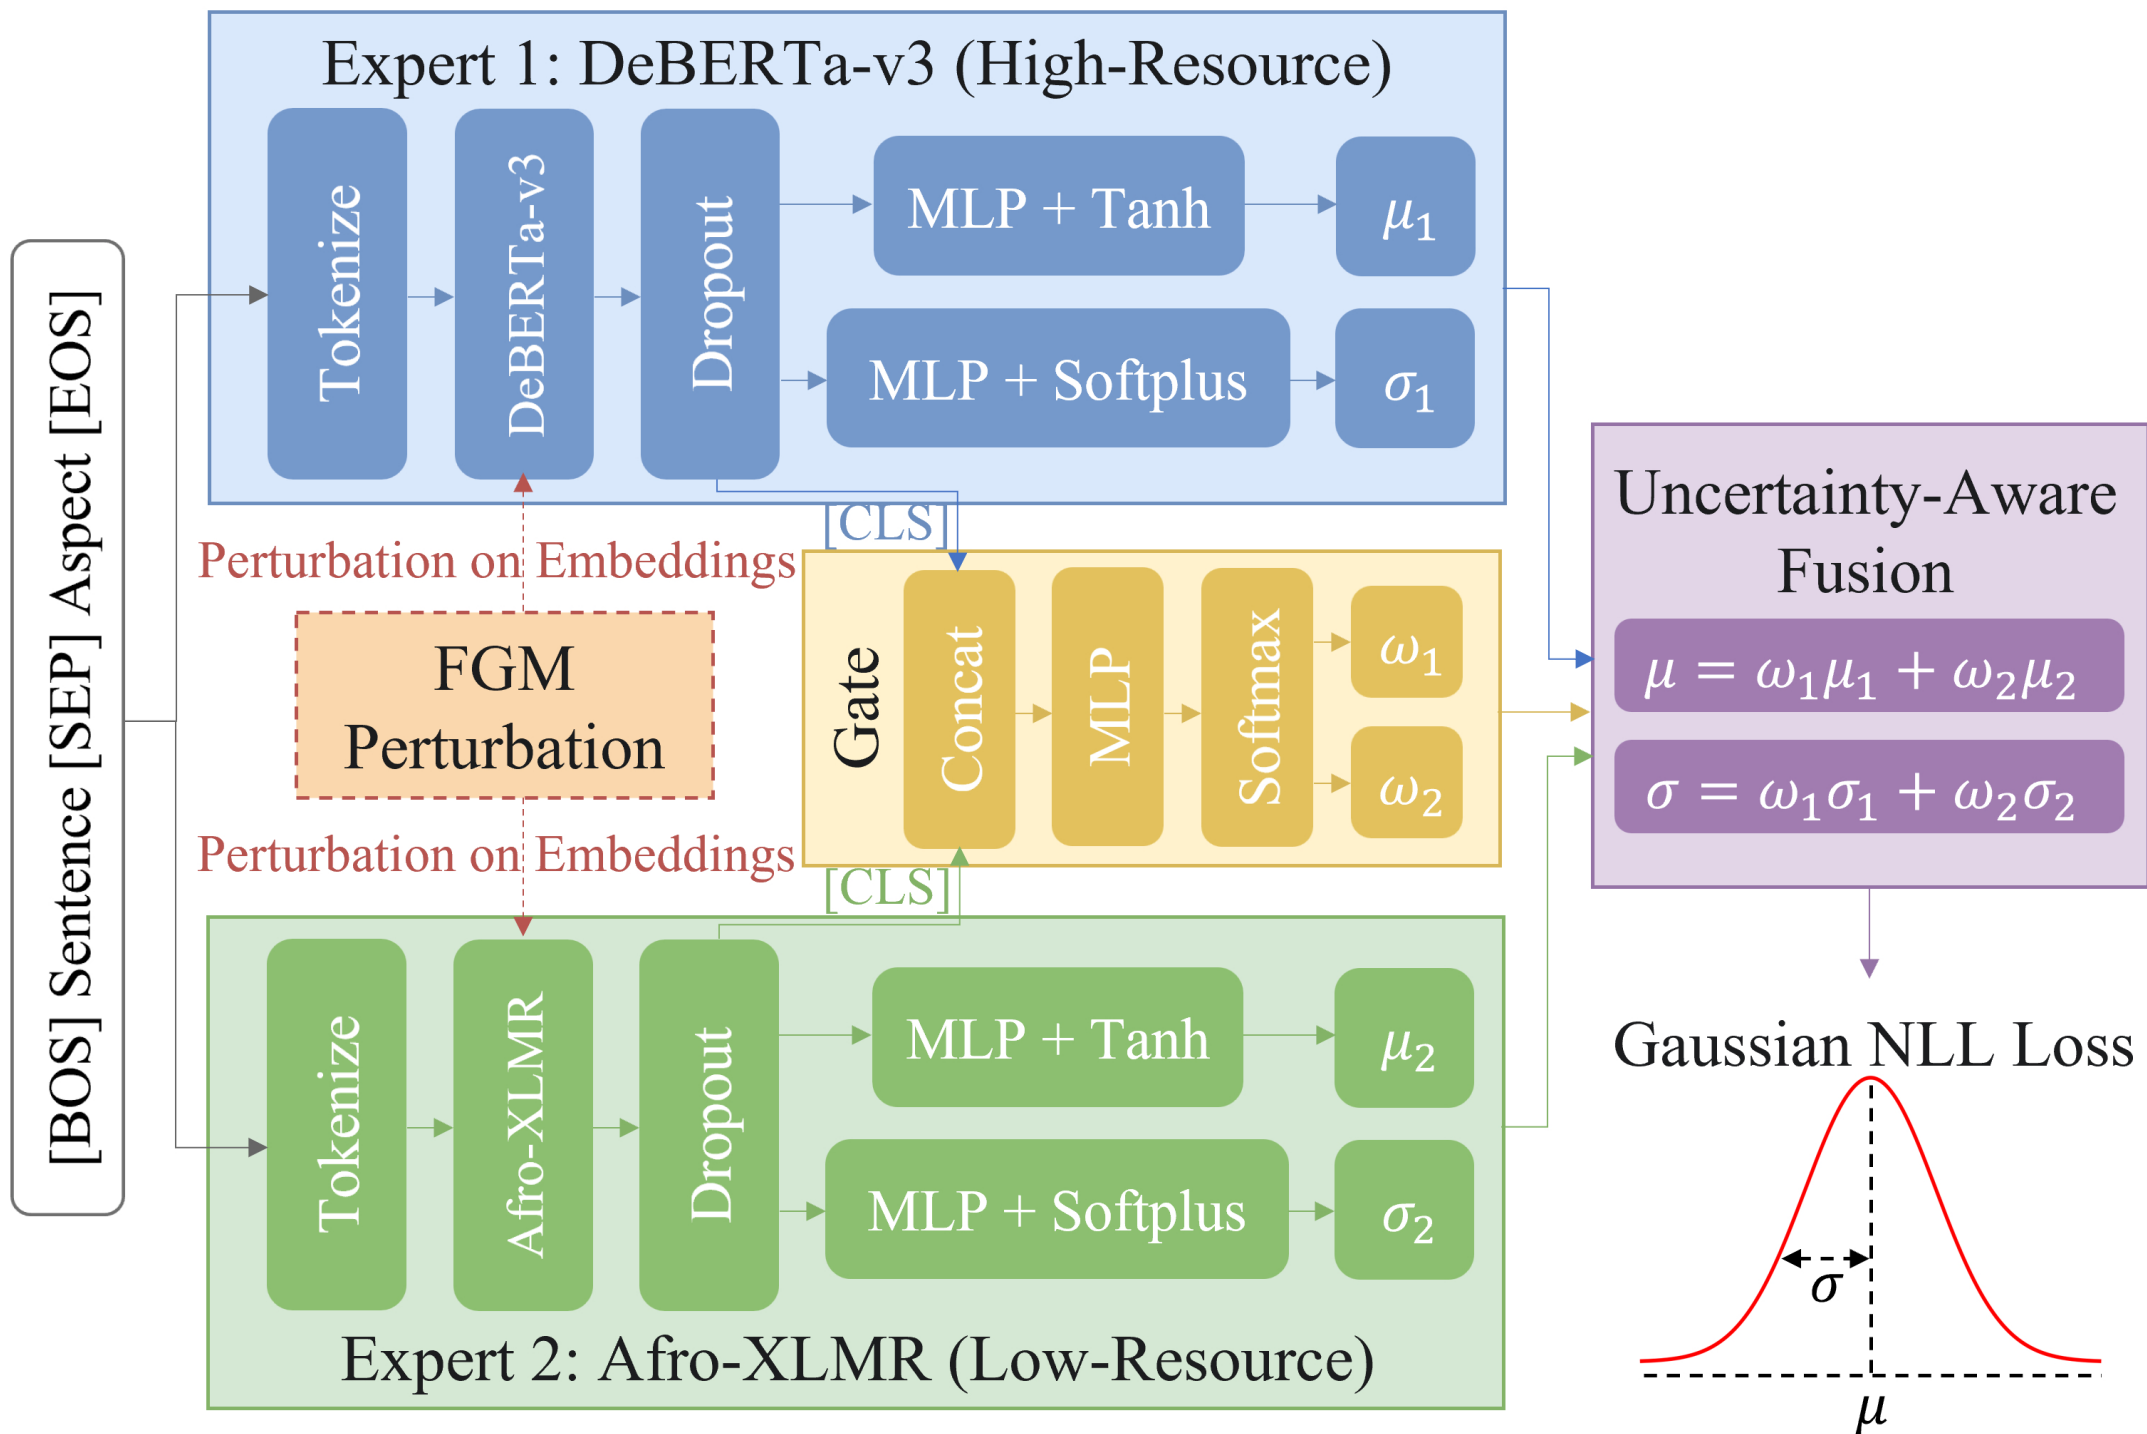

Supplement: SupplementaryMaterial [file system.pdf › Source/latex/figures/system.pdf]
